# Supplementary material
Source: PubMed Central journal article supplement (PMC10620656)
Supplement: jcsm.10696.sm001.pdf [file jcsm.10696.sm001.pdf]

**Table S1**—Descriptive characteristics of eating behaviors at baseline and endpoint by sleep conditions (AS and SR).

|                           | <b>AS wk0</b> | <b>AS wk6</b> | <b>SR wk0</b> | <b>SR wk6</b> |
|---------------------------|---------------|---------------|---------------|---------------|
| <b>Eating Occasion</b>    |               |               |               |               |
| Mean ± SD                 | 4.1 ± 1.2     | 4.3±1.2       | 4.2 ± 1.3     | 4.2 ± 1.3     |
| Range                     | 1.3-8.0       | 2-8           | 1.7-8.3       | 1.7-7.3       |
| <b>Eating Window</b>      |               |               |               |               |
| Mean ± SD                 | 10.2 ± 2.1    | 10.5 ± 1.8    | 10.7 ± 2.2    | 11.0 ± 2.2    |
| Range                     | 2.2-14        | 6.5-14        | 5.1-15        | 5.9-15        |
| <b>Eating Midpoint</b>    |               |               |               |               |
| Mean ± SD                 | 14:31 ± 01:08 | 14:25 ± 01:07 | 14:35-01:06   | 14:34-01:04   |
| Range                     | 11:45-18:05   | 11:53-17:35   | 11:18-17:35   | 12:20-14:42   |
| <b>SD Eating Occasion</b> |               |               |               |               |
| Mean ± SD                 | 0.8 ± 0.6     | 0.7 ± 0.6     | 0.8 ± 0.5     | 0.7 ± 0.6     |
| Range                     | 0-3.1         | 0-2.3         | 0-2.9         | 0-2.3         |
| <b>SD Eating Window</b>   |               |               |               |               |
| Mean ± SD                 | 1.7 ± 1.2     | 1.6 ± 1.2     | 1.9 ± 1.3     | 1.8 ± 1.2     |
| Range                     | 0.9-6.3       | 0.9-6.3       | 0-6.2         | 0.5-5.3       |
| <b>SD Eating Midpoint</b> |               |               |               |               |
| Mean ± SD                 | 00:50 ± 00:35 | 00:46 ± 00:31 | 00:53 ± 00:34 | 0:55 ± 00:35  |
| Range                     | 00:03-03:10   | 00:11-02:46   | 00:01-03:12   | 00:04-03:00   |

SD: standard deviation; AS: adequate sleep; SR: sleep restriction.
